# Supplementary material for: Tuning the photophysical properties of lanthanide(iii)/zinc(ii) ‘encapsulated sandwich’ metallacrowns emitting in the near-infrared range
Source: Royal Society of Chemistry journal article supplement (doi:10.1039/d1sc06769a), 2022-01-01
Supplement: d1sc06769a1.pdf [file d1sc06769a1.pdf]

# Tuning the Photophysical Properties of Lanthanide(III)/Zinc(II) 'Encapsulated Sandwich' Metallocrowns Emitting in the Near-Infrared Range†

Svetlana V. Eliseeva,<sup>\*, ‡, a</sup> Tu N. Nguyen,<sup>‡, b, c</sup> Jeff W. Kampf,<sup>b</sup> Evan R. Trivedi,<sup>b, d</sup> Vincent L. Pecoraro<sup>\*, b</sup>  
and Stéphane Petoud<sup>\*, a</sup>

<sup>a</sup>Centre de Biophysique Moléculaire, CNRS UPR 4301, F-45071 Orléans Cedex 2, France. \*Emails: S.V. Eliseeva,  
[svetlana.eliseeva@cnsr-orleans.fr](mailto:svetlana.eliseeva@cnsr-orleans.fr); S. Petoud, [stephane.petoud@inserm.fr](mailto:stephane.petoud@inserm.fr)

<sup>b</sup>Department of Chemistry, Willard H. Dow Laboratories, University of Michigan, Ann Arbor, Michigan 48109, USA. \*Email:  
V. L. Pecoraro, [vlpec@umich.edu](mailto:vlpec@umich.edu)

<sup>c</sup> Current address: Helen Scientific Research and Technological Development Co., Ltd, Ho Chi Minh City, Vietnam.

<sup>d</sup> Current address: Department of Chemistry, Oakland University, Rochester, Michigan 48309, USA

## Table of content

|                                                |    |
|------------------------------------------------|----|
| NMR spectra .....                              | 2  |
| Mass spectra.....                              | 5  |
| X-Ray crystallography .....                    | 10 |
| Photophysical data .....                       | 13 |
| Absorption spectra .....                       | 13 |
| Energy levels and phosphorescence spectra..... | 14 |
| References .....                               | 15 |

## NMR spectra

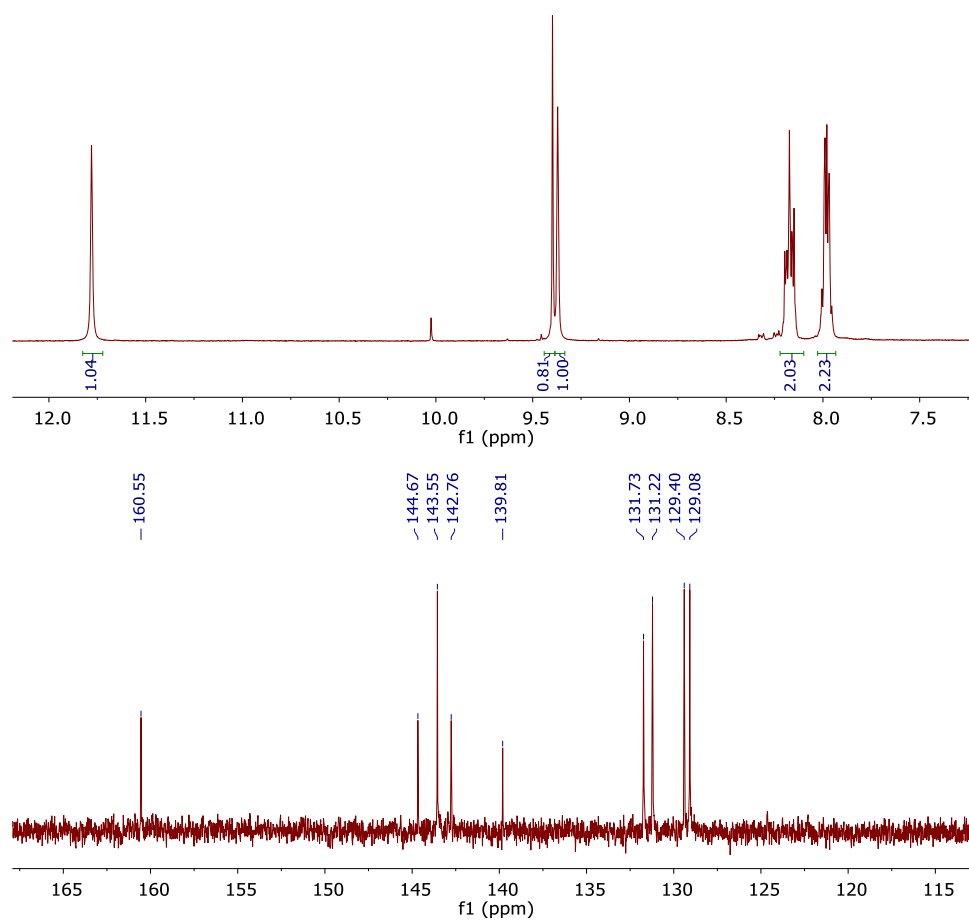

**Figure S1.** <sup>1</sup>H- and <sup>13</sup>C NMR spectra of H<sub>2</sub>quinoHA collected in DMSO-*d*<sub>6</sub>.

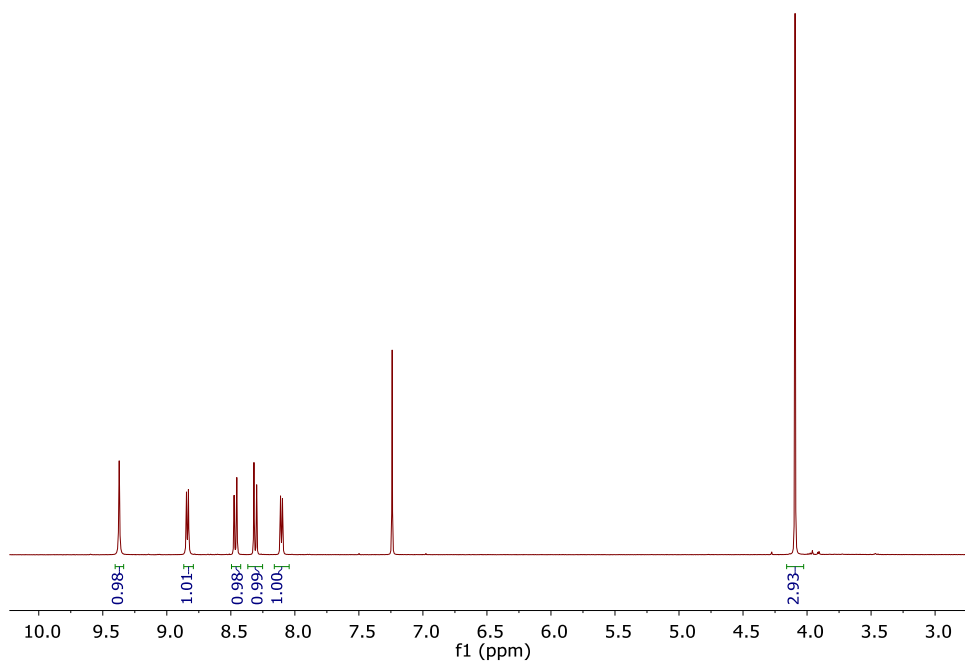

**Figure S2.**  $^1\text{H}$ NMR spectrum of methyl naphthyrine-2-carboxylate collected in  $\text{CDCl}_3$ .

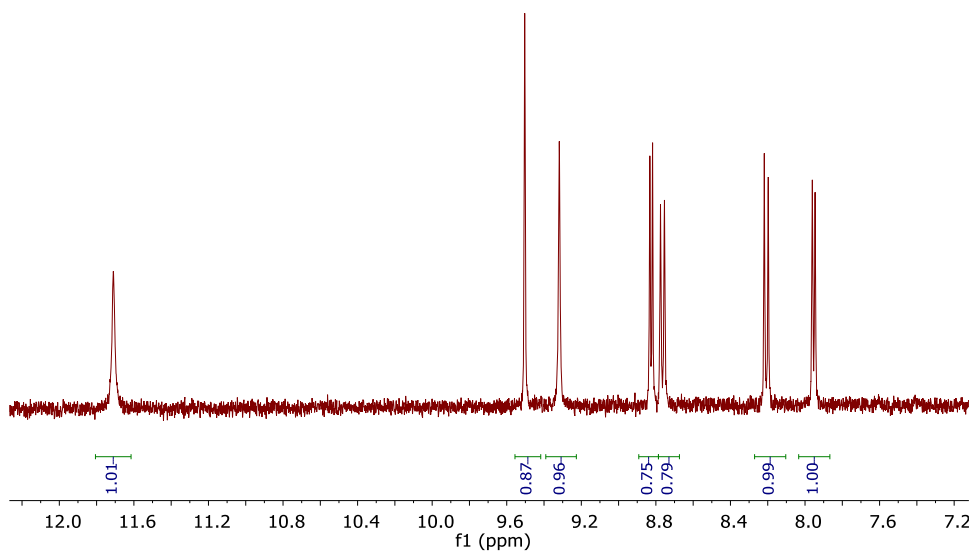

**Figure S3.**  $^1\text{H}$ NMR spectrum of  $\text{H}_2\text{napHA}$  collected in  $\text{DMSO}-d_6$ .

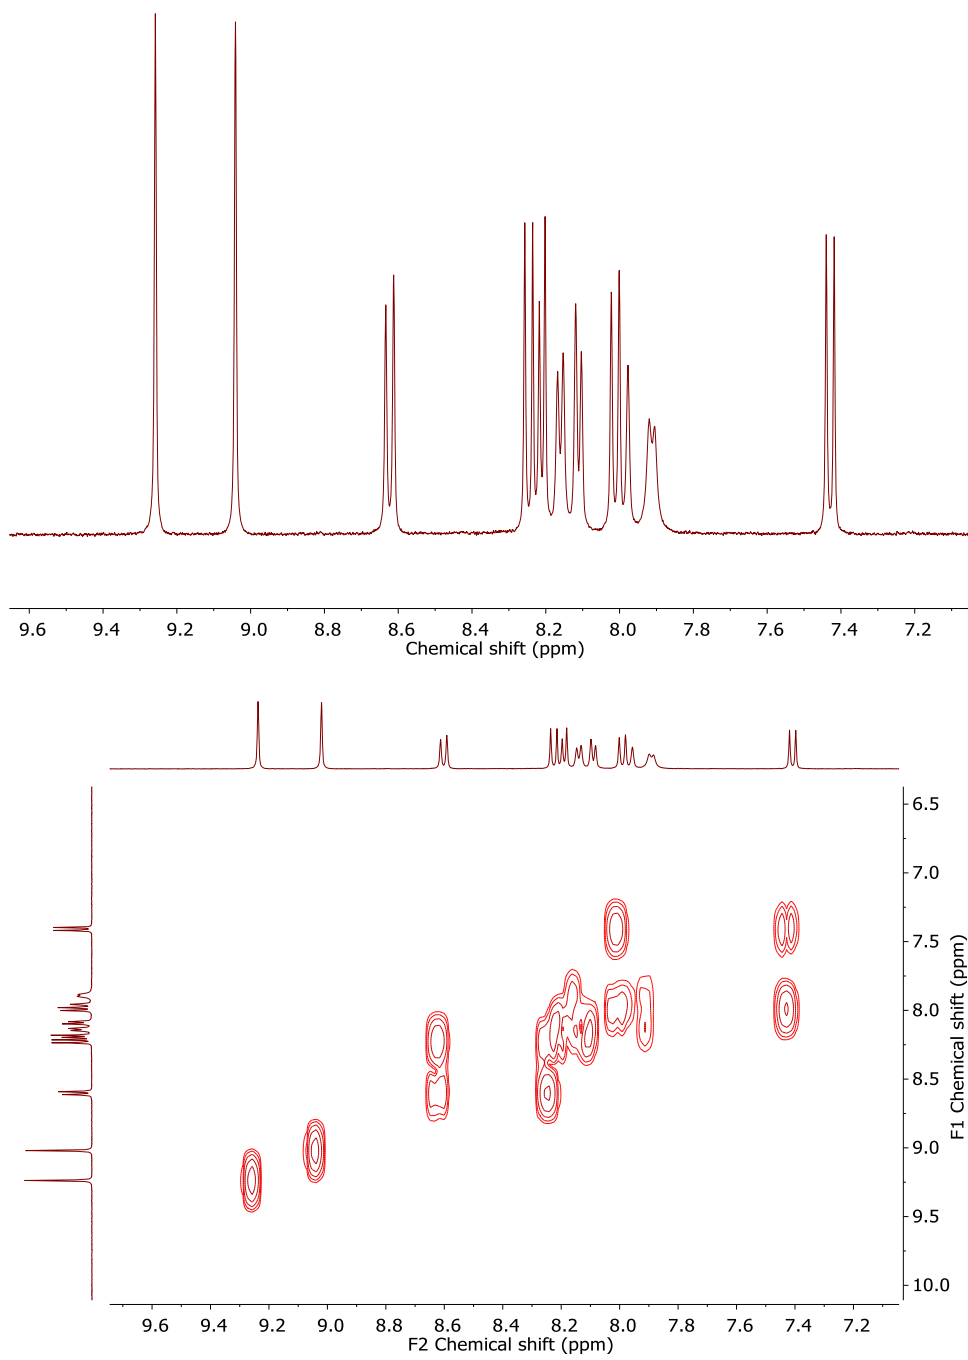

**Figure S4.**  $^1\text{H}$ - and COSY-NMR spectra of  $\text{Zn}_{16}\text{Y}(\text{napHA})_{16}$  collected in  $\text{CD}_3\text{OD}$ .

# Mass spectra

TN-1-181es+ 45 (0.824)

TOF MS ES+  
4.95e3

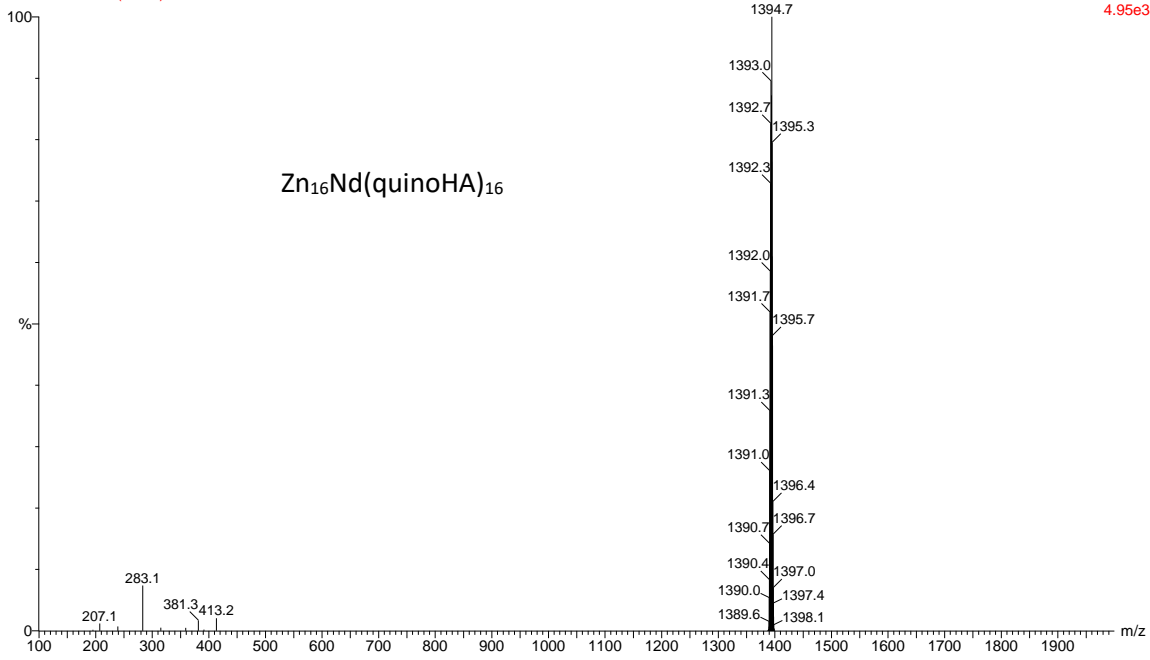

TN-2-3es+ 67 (1.228)

TOF MS ES+  
7.84e3

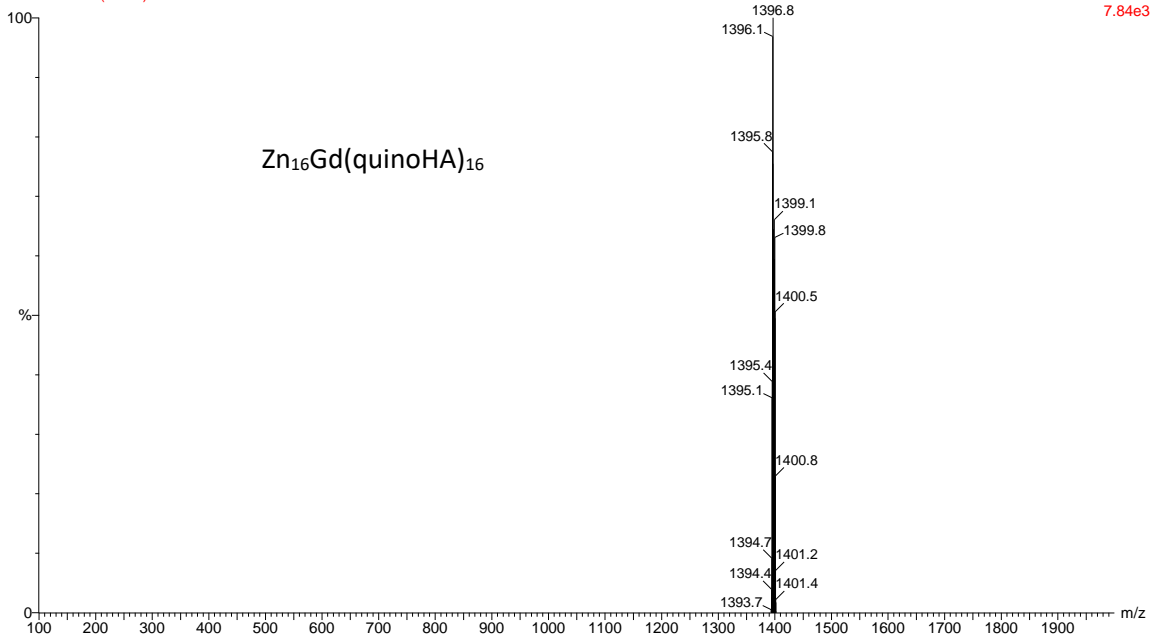

TN-2-1es+ 59 (1.081)

TOF MS ES+  
1.15e4

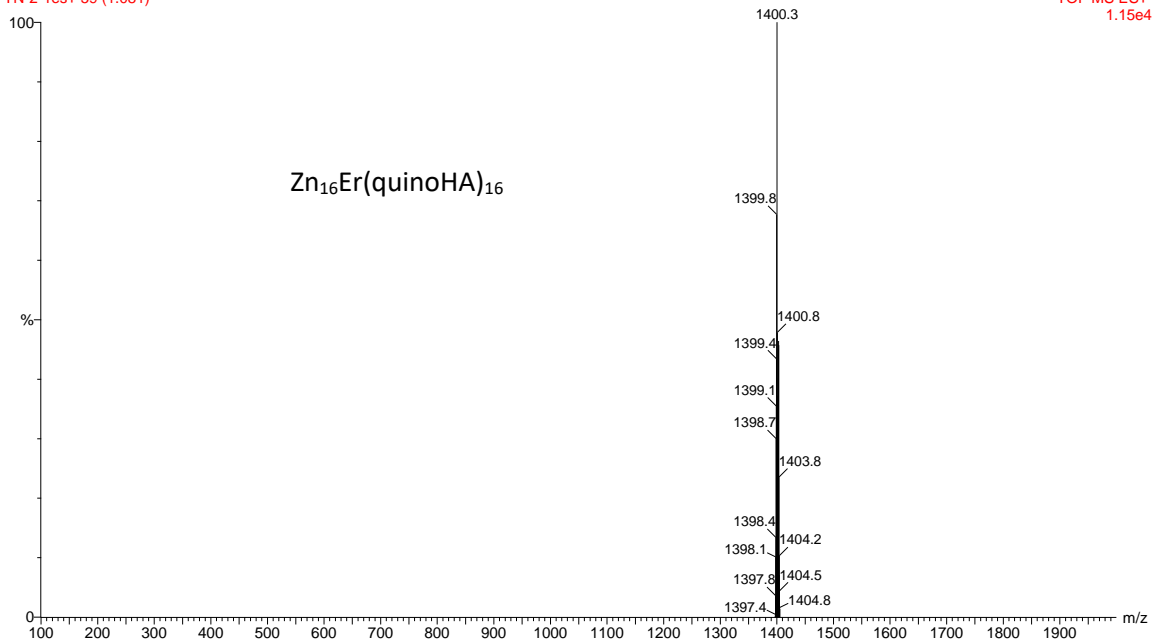

TN-1-183 39 (0.715)

TOF MS ES+  
1.69e3

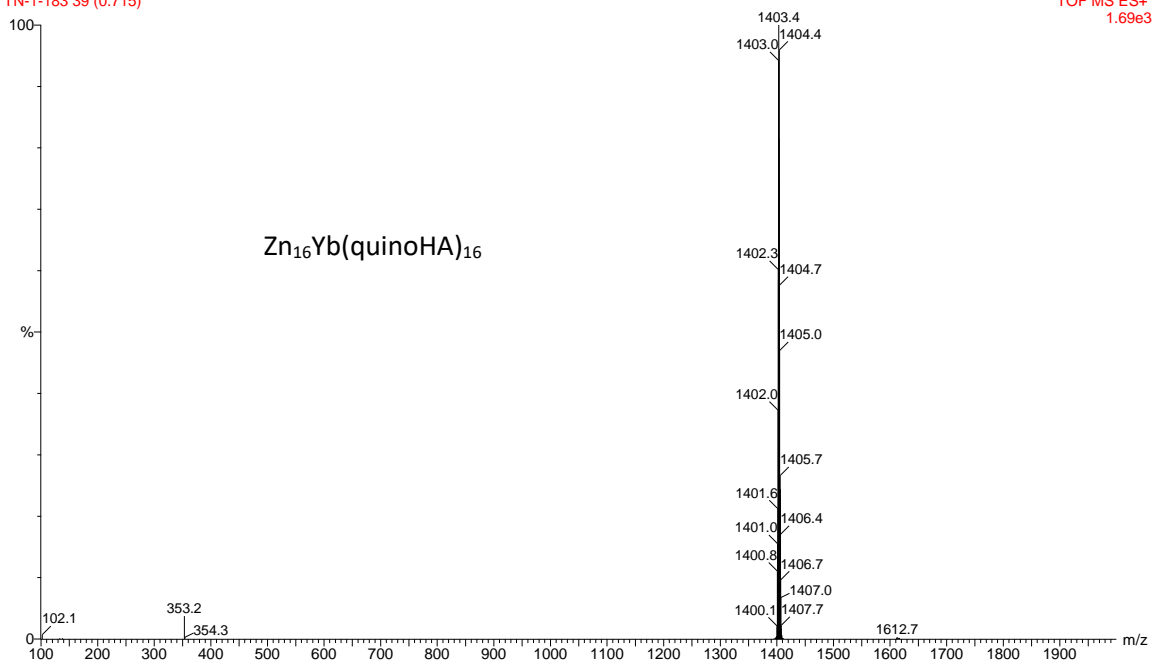

TN-2-8es+ 19 (0.347)

TOF MS ES+  
7.68e3

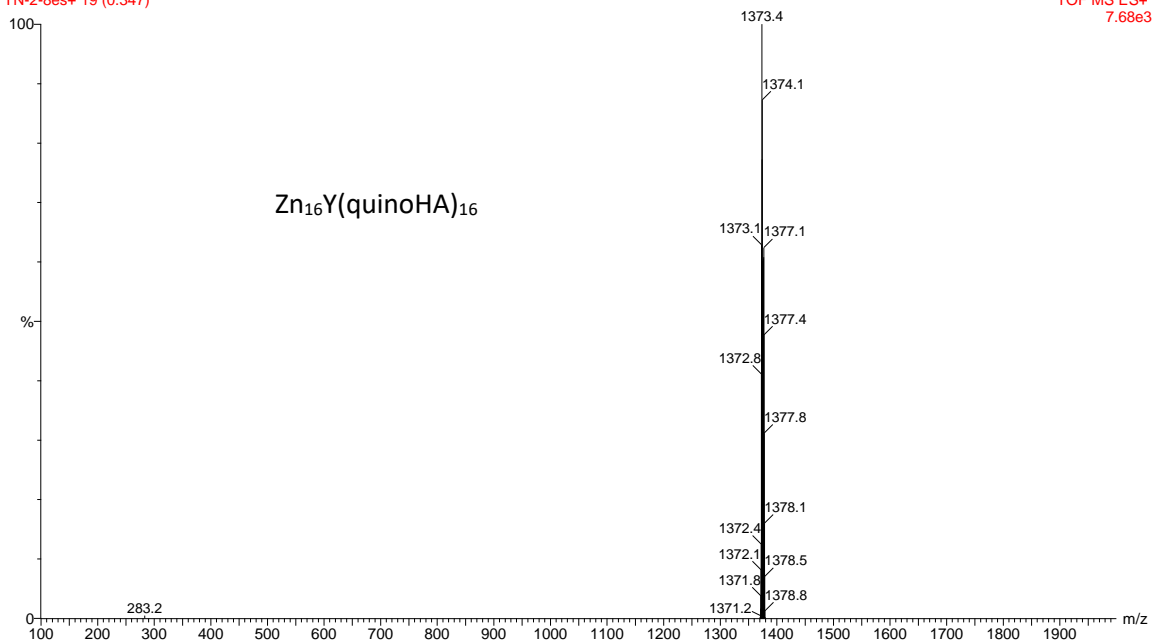

Zn16NdnapHA2 28 (0.513)

TOF MS ES+  
1.52e4

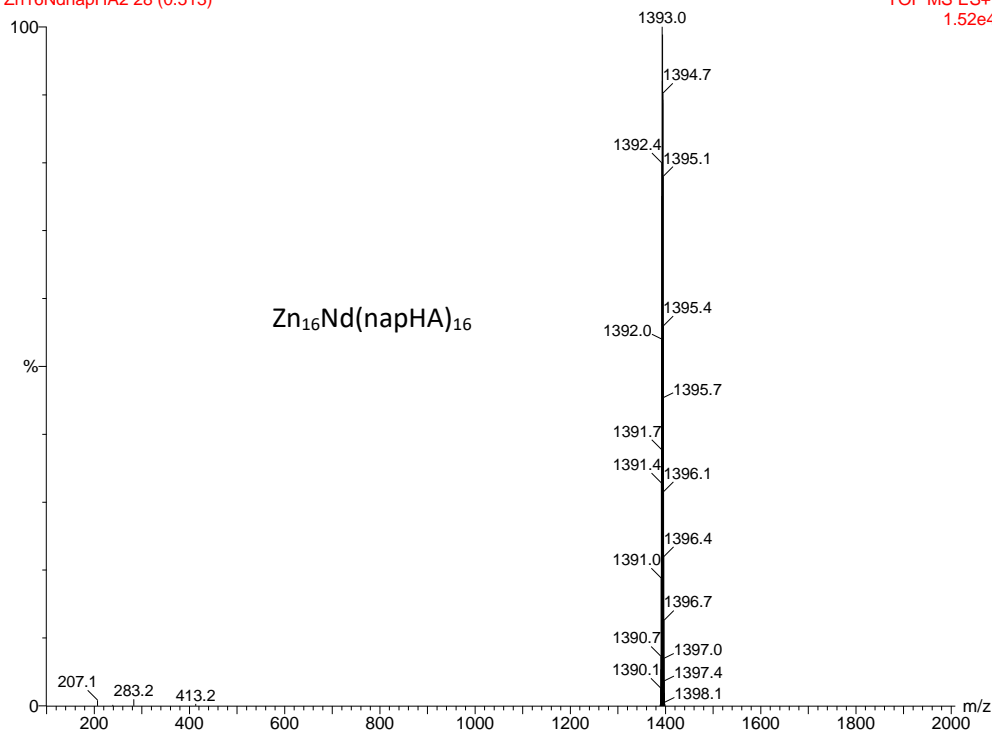

Zn16GdnapHA 29 (0.531)

TOF MS ES+  
2.31e4

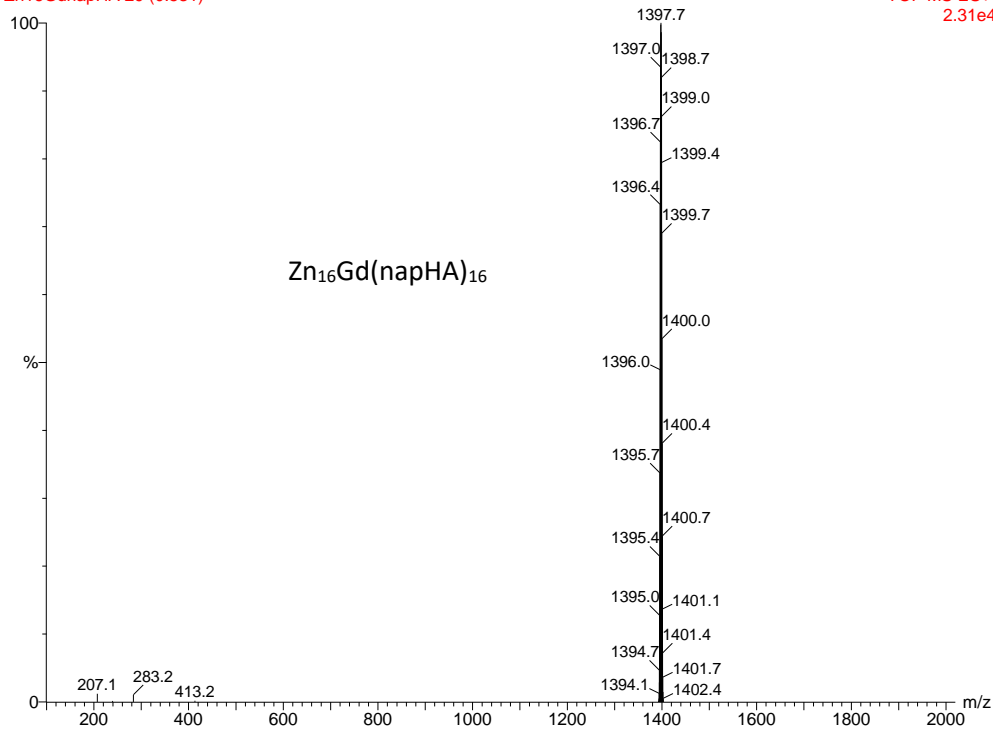

Zn16ErmapHA 24 (0.439)

TOF MS ES+  
2.49e4

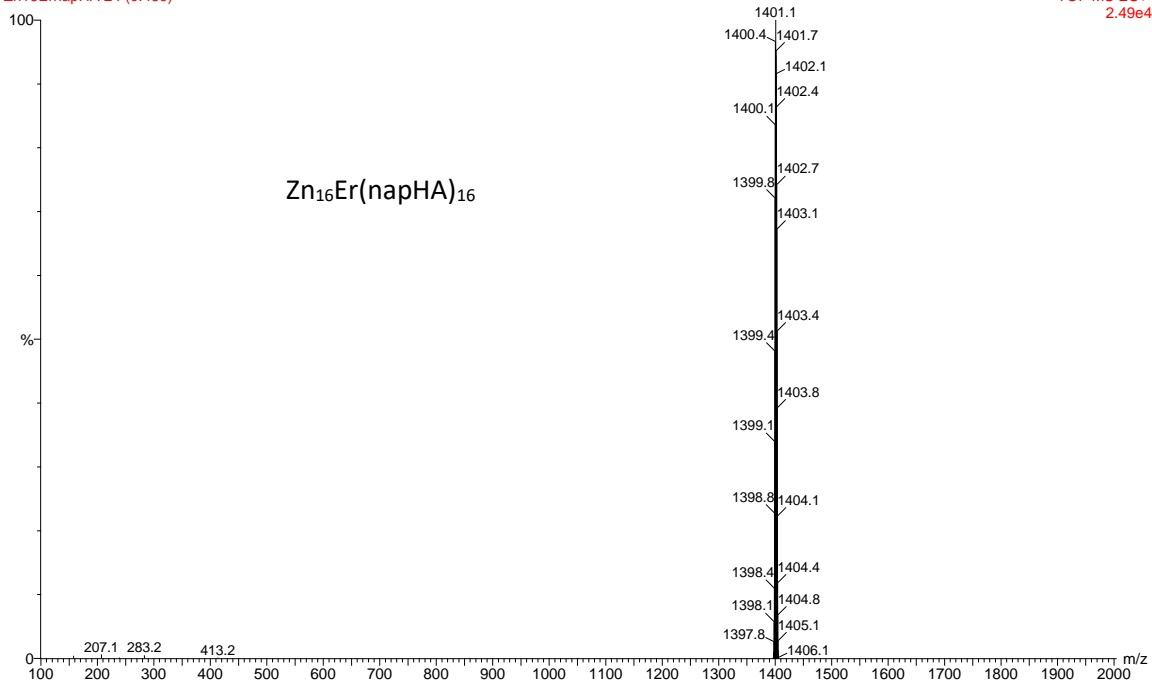



Zn<sub>16</sub>YbnaphHA 15 (0.274)

TOF MS ES+  
3.79e4

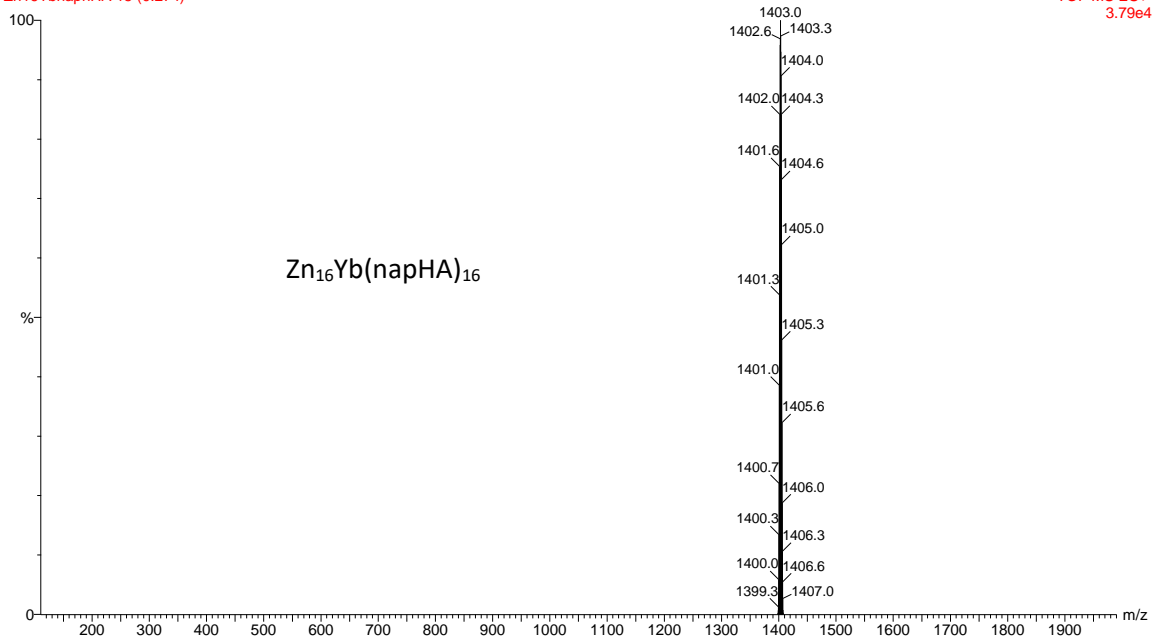

Zn<sub>16</sub>YnapHA 27 (0.494)

TOF MS ES+  
8.42e3

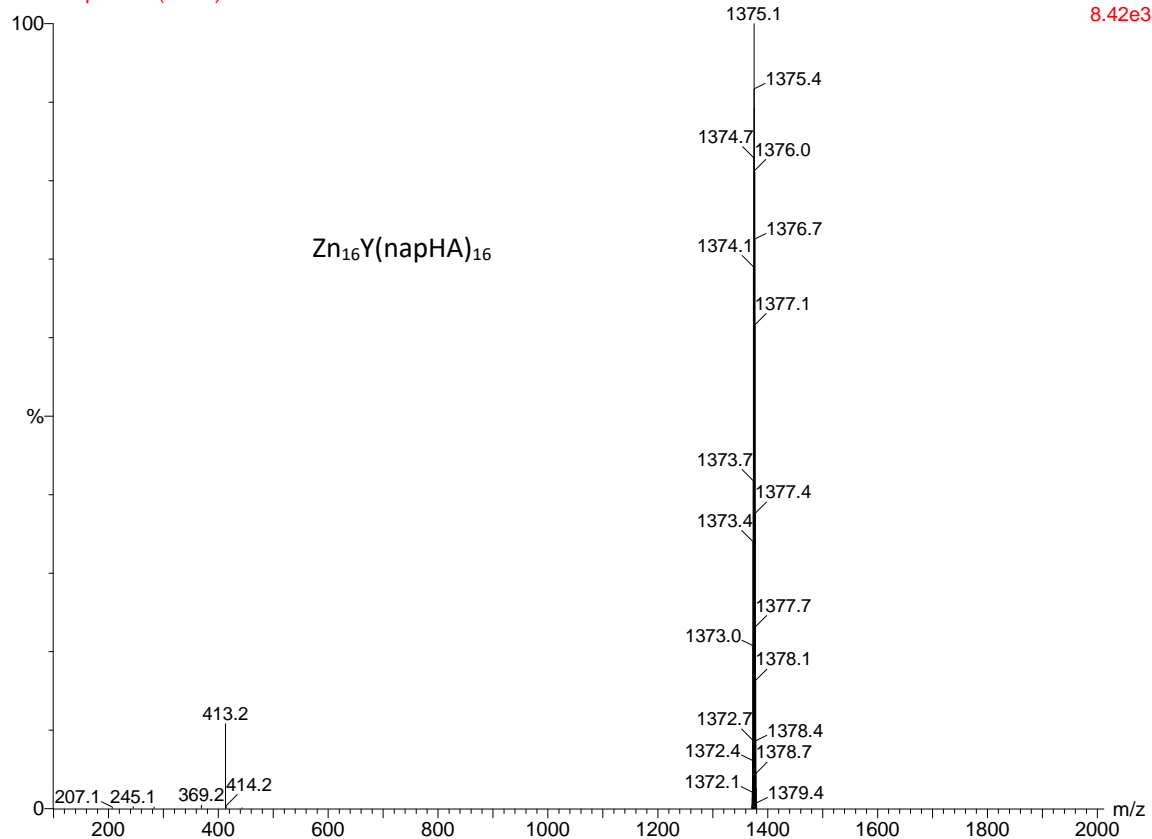

## X-Ray crystallography

**Table S1.** Crystal data and structure refinement for Zn<sub>16</sub>Nd(quinoHA)<sub>16</sub>.

|                                                    |                                                                                                                                                          |
|----------------------------------------------------|----------------------------------------------------------------------------------------------------------------------------------------------------------|
| Identification code                                | tn1177a_sq                                                                                                                                               |
| Empirical formula                                  | C <sub>187</sub> H <sub>120</sub> F <sub>9</sub> N <sub>62</sub> NdO <sub>57.50</sub> S <sub>3</sub> Zn <sub>16</sub>                                    |
| Formula weight                                     | 5612.78                                                                                                                                                  |
| Temperature                                        | 85(2) K                                                                                                                                                  |
| Wavelength                                         | 1.54184 Å                                                                                                                                                |
| Crystal system, space group                        | Tetragonal, <i>P4/ncc</i>                                                                                                                                |
| Unit cell dimensions                               | $a = 29.7978(4) \text{ \AA}$ $\alpha = 90^\circ$<br>$b = 29.7978(4) \text{ \AA}$ $\beta = 90^\circ$<br>$c = 27.5410(19) \text{ \AA}$ $\gamma = 90^\circ$ |
| Volume                                             | 24453.9(18) Å <sup>3</sup>                                                                                                                               |
| Z, Calculated density                              | 4, 1.502 Mg/m <sup>3</sup>                                                                                                                               |
| Absorption coefficient                             | 4.114 mm <sup>-1</sup>                                                                                                                                   |
| <i>F</i> (000)                                     | 11056                                                                                                                                                    |
| Crystal size                                       | 0.200×0.190×0.140 mm                                                                                                                                     |
| Theta range for data collection                    | 2.966 to 74.076 deg.                                                                                                                                     |
| Limiting indices                                   | $-37 \leq h \leq 35$ , $-37 \leq k \leq 37$ , $-34 \leq l \leq 33$                                                                                       |
| Reflections collected / unique                     | 472686 / 12397 [ <i>R</i> (int) = 0.0525]                                                                                                                |
| Completeness to $\theta = 67.684$                  | 99.9 %                                                                                                                                                   |
| Absorption correction                              | Semi-empirical from equivalents                                                                                                                          |
| Max. and min. transmission                         | 1.00000 and 0.66737                                                                                                                                      |
| Refinement method                                  | Full-matrix least-squares on <i>F</i> <sup>2</sup>                                                                                                       |
| Data / restraints / parameters                     | 12397 / 123 / 839                                                                                                                                        |
| Goodness-of-fit on <i>F</i> <sup>2</sup>           | 1.050                                                                                                                                                    |
| Final <i>R</i> indices [ <i>I</i> >2σ( <i>I</i> )] | <i>R</i> <sub>1</sub> = 0.0550, w <i>R</i> <sub>2</sub> = 0.1902                                                                                         |
| <i>R</i> indices (all data)                        | <i>R</i> <sub>1</sub> = 0.0572, w <i>R</i> <sub>2</sub> = 0.1943                                                                                         |
| Extinction coefficient                             | n/a                                                                                                                                                      |
| Largest diff. peak and hole                        | 1.334 and -0.881 e.Å <sup>-3</sup>                                                                                                                       |

**Table S2.** Crystal data and structure refinement for Zn<sub>16</sub>Yb(quinoHA)<sub>16</sub>.

|                                                     |                                                                                                                            |
|-----------------------------------------------------|----------------------------------------------------------------------------------------------------------------------------|
| Identification code                                 | tn1183_sq                                                                                                                  |
| Empirical formula                                   | C <sub>187</sub> H <sub>124.50</sub> F <sub>9</sub> N <sub>56</sub> O <sub>47</sub> S <sub>3</sub> Yb Zn <sub>16</sub>     |
| Formula weight                                      | 5394.06                                                                                                                    |
| Temperature                                         | 85(2) K                                                                                                                    |
| Wavelength                                          | 1.54178 Å                                                                                                                  |
| Crystal system, space group                         | Tetragonal, <i>P4/ncc</i>                                                                                                  |
| Unit cell dimensions                                | $a = 30.0778(4)$ Å $\alpha = 90^\circ$<br>$b = 30.0778(4)$ Å $\beta = 90^\circ$<br>$c = 26.9277(19)$ Å $\gamma = 90^\circ$ |
| Volume                                              | 24360.8(18) Å <sup>3</sup>                                                                                                 |
| Z, Calculated density                               | 4, 1.471 Mg/m <sup>3</sup>                                                                                                 |
| Absorption coefficient                              | 3.315 mm <sup>-1</sup>                                                                                                     |
| <i>F</i> (000)                                      | 10774                                                                                                                      |
| Crystal size                                        | 0.120×0.110×0.080 mm                                                                                                       |
| Theta range for data collection                     | 2.938 to 68.245 deg.                                                                                                       |
| Limiting indices                                    | -36 ≤ <i>h</i> ≤ 36, -36 ≤ <i>k</i> ≤ 36, -32 ≤ <i>l</i> ≤ 32                                                              |
| Reflections collected / unique                      | 386106 / 11168 [ <i>R</i> (int) = 0.0946]                                                                                  |
| Completeness to $\theta = 67.684$                   | 99.9 %                                                                                                                     |
| Absorption correction                               | Semi-empirical from equivalents                                                                                            |
| Max. and min. transmission                          | 0.8747 and 0.4461                                                                                                          |
| Refinement method                                   | Full-matrix least-squares on <i>F</i> <sup>2</sup>                                                                         |
| Data / restraints / parameters                      | 11168 / 93 / 779                                                                                                           |
| Goodness-of-fit on <i>F</i> <sup>2</sup>            | 1.045                                                                                                                      |
| Final <i>R</i> indices [ <i>I</i> > 2σ( <i>I</i> )] | <i>R</i> <sub>1</sub> = 0.0687, w <i>R</i> <sub>2</sub> = 0.2087                                                           |
| <i>R</i> indices (all data)                         | <i>R</i> <sub>1</sub> = 0.0768, w <i>R</i> <sub>2</sub> = 0.2193                                                           |
| Extinction coefficient                              | 0.00019(2)                                                                                                                 |
| Largest diff. peak and hole                         | 1.426 and -1.017 e.Å <sup>-3</sup>                                                                                         |

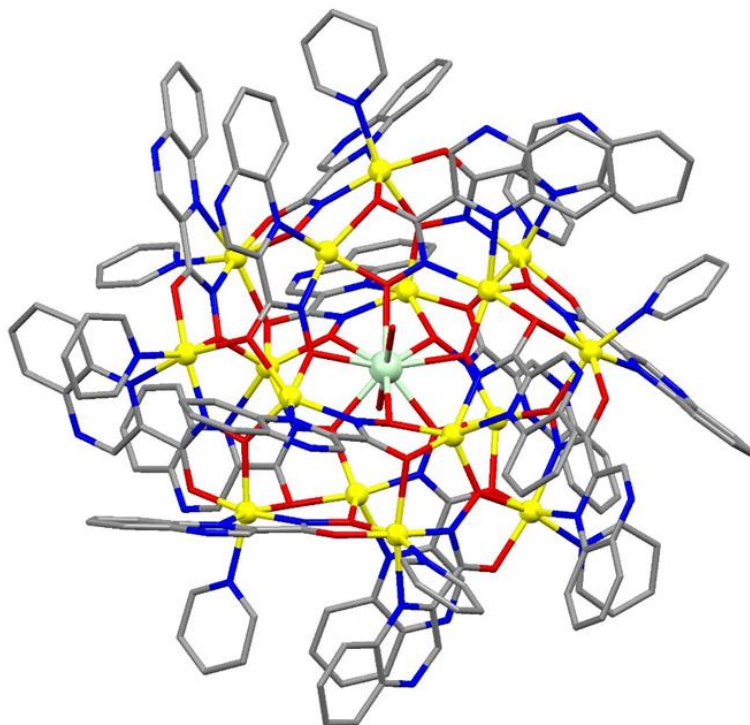

**Figure S5.** Crystal structure of  $\text{Zn}_{16}\text{Nd}(\text{quinoHA})_{16}$  obtained by single-crystal X-ray diffraction. Color code: Light green, Nd; Yellow, Zn; Red, O; Blue, N; Grey, C. H atoms and solvent molecules have been omitted for clarity.

## Photophysical data

### Absorption spectra

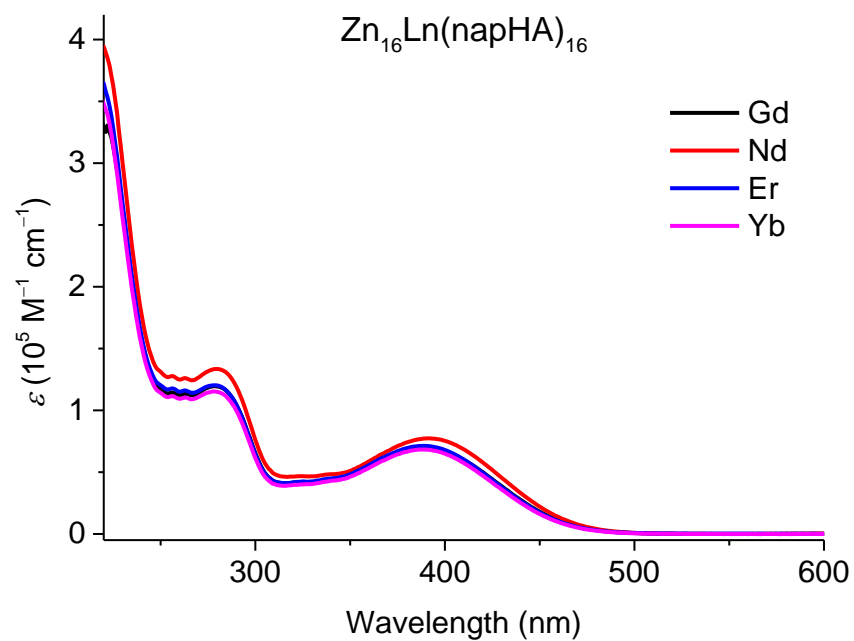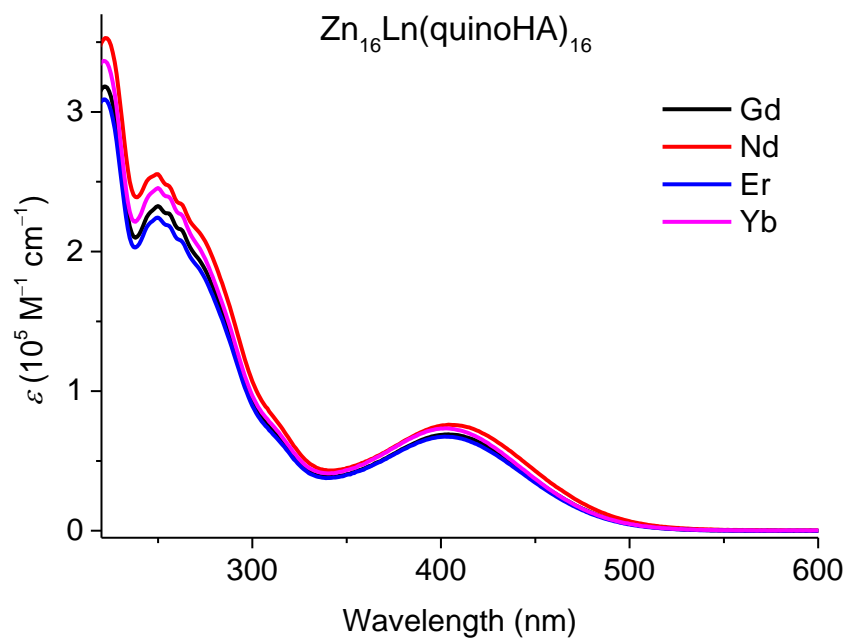

**Figure S6.** Absorption spectra of  $\text{Zn}_{16}\text{Ln}(\text{HA})_{16}$  ( $\text{Ln} = \text{Nd}, \text{Gd}, \text{Er}, \text{Yb}$ ;  $\text{HA} = \text{quinHA}^{2-}, \text{napHA}^{2-}$ ) measured in  $\text{CH}_3\text{OH}$  at room temperature.

**Table S3.** Maxima of the low-energy intra-ligand charge transfer band observed in the absorption spectra of Zn<sub>16</sub>Yb(HA)<sub>16</sub> MCs and corresponding molar absorption coefficients.

| Metallacrown                               | Solvent          | Wavelength (nm) | $\epsilon$ (M <sup>-1</sup> cm <sup>-1</sup> ) |
|--------------------------------------------|------------------|-----------------|------------------------------------------------|
| Zn <sub>16</sub> Ln(picHA) <sub>16</sub>   | MeOH             | 330             | 68590                                          |
| Zn <sub>16</sub> Ln(pyzoHA) <sub>16</sub>  | H <sub>2</sub> O | 360             | 48010                                          |
| Zn <sub>16</sub> Ln(quinHA) <sub>16</sub>  | MeOH             | 380             | 53480                                          |
| Zn <sub>16</sub> Ln(quinoHA) <sub>16</sub> | MeOH             | 402             | 73370                                          |
| Zn <sub>16</sub> Ln(napHA) <sub>16</sub>   | MeOH             | 387             | 68290                                          |

### **Energy levels and phosphorescence spectra**

**Table S4.** Energies of singlet, triplet and ILCT states in Zn<sub>16</sub>Ln(HA)<sub>16</sub>.

| Metallacrown                               | Singlet (cm <sup>-1</sup> ) <sup>a</sup> | Triplet (cm <sup>-1</sup> ) <sup>a</sup> | ILCT (cm <sup>-1</sup> ) <sup>b</sup> | Ref.         |
|--------------------------------------------|------------------------------------------|------------------------------------------|---------------------------------------|--------------|
| Zn <sub>16</sub> Ln(picHA) <sub>16</sub>   | 31250                                    | 24690                                    | 25000                                 | This work    |
| Zn <sub>16</sub> Ln(pyzoHA) <sub>16</sub>  | 28570                                    | 25035                                    | 22220                                 | This work    |
| Zn <sub>16</sub> Ln(quinHA) <sub>16</sub>  | 29850                                    | 21000                                    | 21560                                 | <sup>1</sup> |
| Zn <sub>16</sub> Ln(quinoHA) <sub>16</sub> | 26320                                    | 24150                                    | 19685                                 | This work    |
| Zn <sub>16</sub> Ln(napHA) <sub>16</sub>   | 22370                                    | 25510                                    | 20830                                 | This work    |

<sup>a</sup> Determined at the edge of absorption spectra of the corresponding hydroxamic acids. <sup>b</sup> Determined as 0-0 transition either from the Gaussian decomposition or as an onset of the phosphorescence spectra of Zn<sub>16</sub>Gd(HA)<sub>16</sub> (Figure S7). <sup>c</sup> Determined at the edge of absorption spectra of Zn<sub>16</sub>Ln(HA)<sub>16</sub>.

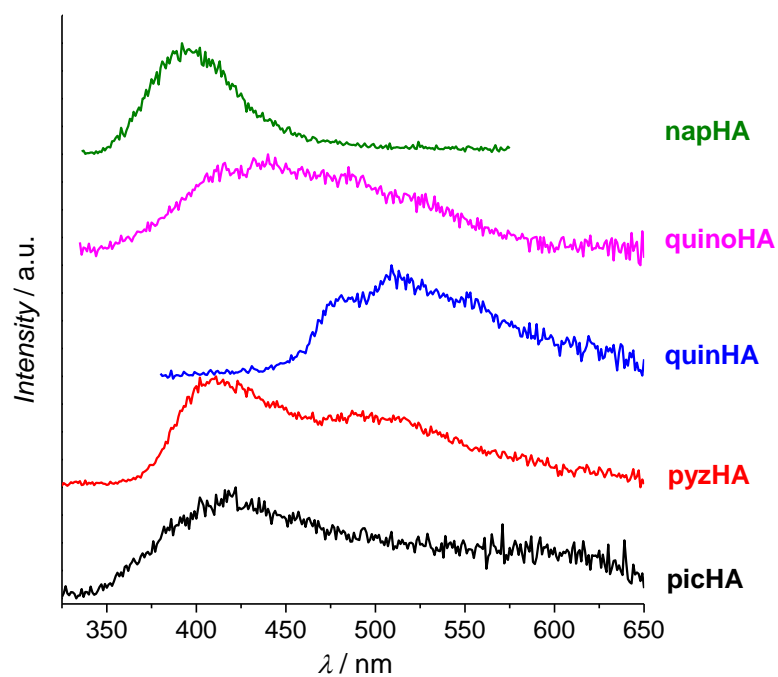

**Figure S7.** Phosphorescence spectra ( $\lambda_{\text{ex}} = 290\text{-}320$  nm) of  $\text{Zn}_{16}\text{Gd}(\text{HA})_{16}$  collected in the solid state at 77 K upon applying a 100-200  $\mu\text{s}$  delay after the excitation flash.

## References

1. E. R. Trivedi, S. V. Eliseeva, J. Jankolovits, M. M. Olmstead, S. Petoud and V. L. Pecoraro, *J. Am. Chem. Soc.*, 2014, **136**, 1526-1534.
